# Supplementary material for: OPNa Overexpression Is Associated with Matrix Calcification in Thyroid Cancer Cell Lines
Source: MDPI journal article supplement (doi:10.3390/ijms19102990), 2018-09-30
Supplement: s1 [file s1]

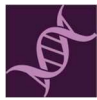

Supplementary Material

# OPNa Overexpression Is Associated with Matrix Calcification in Thyroid Cancer Cell Lines

Luciana B. Ferreira <sup>1,2,3</sup>, Raquel T. Lima <sup>1,2,4</sup>, Ana Clara Santos da Fonseca Bastos <sup>3</sup>,  
Andreia M. Silva <sup>1,5,6</sup>, Catarina Tavares <sup>1,2</sup>, Ana Pestana <sup>1,2</sup>, Elisabete Rios <sup>1,2,4,7</sup>, Catarina Eloy <sup>2</sup>,  
Manuel Sobrinho-Simões <sup>1,2,4,7</sup>, Etel R. P. Gimba <sup>3,8,\*</sup> and Paula Soares <sup>1,2,4,\*</sup>

<sup>1</sup> i3S-Instituto de Investigação e Inovação em Saúde, Universidade do Porto, 4200-135 Porto Portugal;  
luciana.bueno.ferreira@gmail.com (L.B.F.); rlima@ipatimup.pt (R.T.L.); andreia.silva@ineb.up.pt (A.M.S.);  
ctavares@ipatimup.pt (C.T.); apestana@ipatimup.pt (A.P.); erios@ipatimup.pt (E.R.);  
ssimoes@ipatimup.pt (M.S.-S.)

<sup>2</sup> Institute of Molecular Pathology and Immunology of the University of Porto (Ipaticum), 4200-135 Porto,  
Portugal; celoy@ipatimup.pt

<sup>3</sup> Research Coordination, National Institute of Cancer, Rio de Janeiro 20230-130, Brazil;  
anaclarafonseca\_93@hotmail.com

<sup>4</sup> Medical Faculty, University of Porto, 4200-319 Porto, Portugal

<sup>5</sup> INEB—Instituto de Engenharia Biomédica, 4200-135, Porto, Portugal

<sup>6</sup> ICBAS—Instituto de Ciências Biomédicas Abel Salazar da Universidade do Porto, 4050-313 Porto, Portugal

<sup>7</sup> Department of Pathology, Hospital de S. João, 4200-319 Porto, Portugal

<sup>8</sup> Natural Sciences Department, Health and Humanities Institute, Fluminense Federal University,  
Rio de Janeiro 28880-000, Brazil

\* Correspondence etelgimba@id.uff.br (E.R.P.G.), [psouares@ipatimup.pt](mailto:psouares@ipatimup.pt) (P.S.). Tel.: +55-21-3207-6599  
(E.R.P.G.); Tel.: +315-225513618 (P.S.)

Received: 29 August 2018; Accepted: 27 September 2018; Published: 30 September 2018

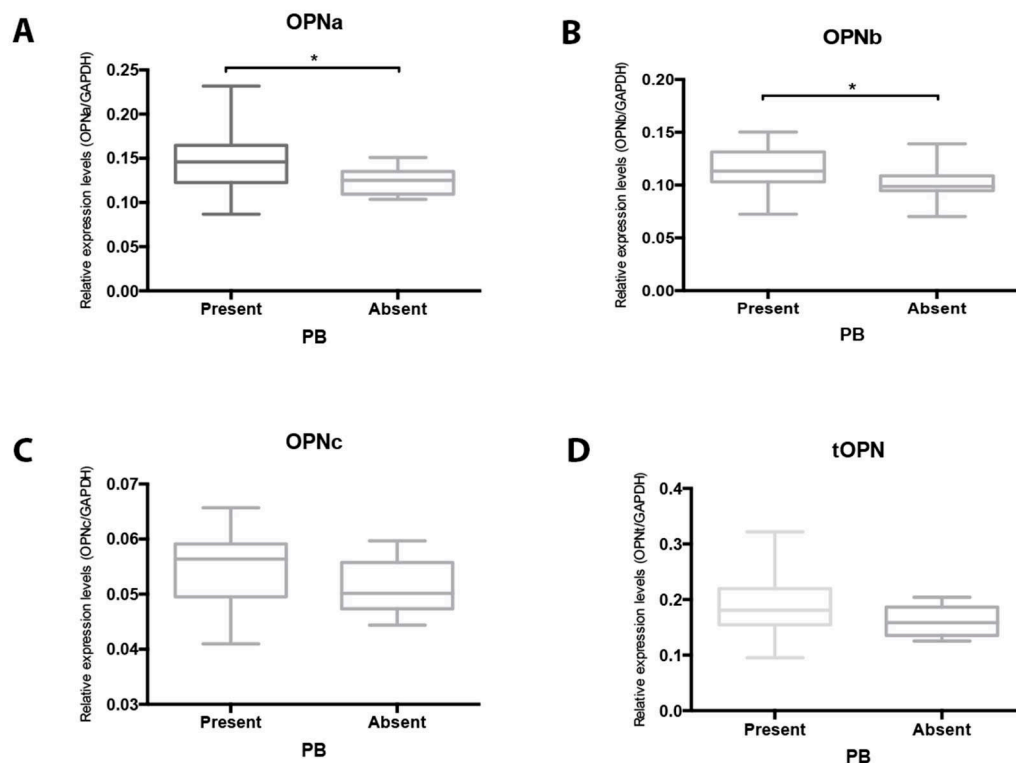

Figure S1. Expression levels of OPNa, OPNb, OPNc and tOPN transcripts in cPTC samples, concerning presence or absence of PB. (A) OPNa (B) OPNb (C) OPNc and (D) tOPN mRNA expression levels were measured by real time PCR in the cPTC samples. \*  $p < 0.05$ . Results are from at least two independent assays with triplicates.

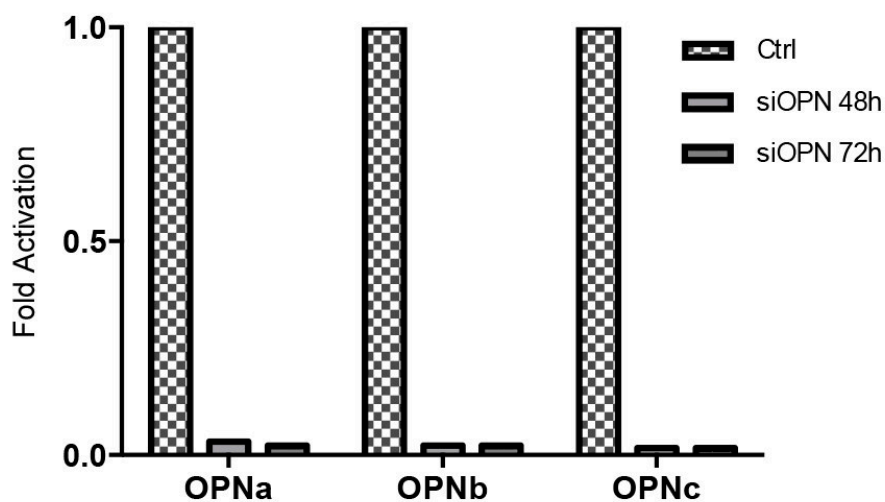

Figure S2. Expression levels of three OPN splice variants in response to total OPN silencing. OPNa, OPNb and OPNc mRNA expression levels have been measured by real time PCR in TPC1 thyroid cell line after 48 and 72 hours post total OPN (tOPN) silencing. Cells were treated with 100nM of siRNA for tOPN and 100nM of siRNA negative control (ctrl) during 48h and 72h.

Table S1. Staining score of tOPN IHC in cPTC samples.

| OPN Staining Score* | n  | %    |
|---------------------|----|------|
| 0                   | 19 | 39.6 |
| 1                   | 1  | 2.1  |
| 2                   | 7  | 14.6 |
| 3                   | 6  | 12.5 |
| 4                   | 2  | 4.2  |
| 5                   | 7  | 14.6 |
| 6                   | 5  | 10.4 |
| 7                   | 1  | 2.1  |

\* Staining intensity plus % of positive stained cells; osteopontin (OPN).

Table S2. Correlation between tOPN protein expression and the clinicopathological characteristics in cPTC.

| Variable          | N (%)   | OPN Score Mean | p value |
|-------------------|---------|----------------|---------|
| Sex *             |         |                |         |
| Male              | 6 (13)  | 1.50           | 0.34    |
| Female            | 41 (87) | 2.49           |         |
| Age (years) *     |         |                |         |
| < 45              | 26 (55) | 2.15           | 0.48    |
| ≥ 45              | 20 (45) | 2.65           |         |
| Stroma            |         |                |         |
| Absent            | 21 (43) | 1.48           | 0.01    |
| Present           | 27 (57) | 3.04           |         |
| Tumor Size (cm) * |         |                |         |
| < 2               | 17 (37) | 2.94           | 0.22    |

|                                       |         |      |      |
|---------------------------------------|---------|------|------|
| $\geq 2$                              | 29 (63) | 2.07 |      |
| Extrathyroid Extension*               |         |      |      |
| Absent                                | 24 (57) | 1.79 | 0.09 |
| Present                               | 18 (43) | 3.00 |      |
| Invasion (capsular and/or vascular) * |         |      |      |
| Absent                                | 15 (35) | 1.93 | 0.49 |
| Present                               | 28 (65) | 2.46 |      |
| Lymph Node Metastases *               |         |      |      |
| Absent                                | 21 (60) | 2.33 | 0.71 |
| Present                               | 14 (40) | 2.64 |      |
| RET/PTC rearrangement *               |         |      |      |
| Absent                                | 37 (84) | 2.57 | 0.88 |
| Present                               | 7 (16)  | 2.43 |      |
| BRAF <sup>V600E</sup> mutation *      |         |      |      |
| Absent                                | 22 (48) | 2.64 | 0.62 |
| Present                               | 24 (52) | 2.29 |      |
| RAS mutation *                        |         |      |      |
| Absent                                | 44 (96) | 2.57 | 0.11 |
| Present                               | 2 (4)   | 0    |      |

\* Clinicopathological data was missing in some cases included in the series.

Table S3. Correlation between the presence of PB and the clinicopathological characteristics in cPTC.

| Psammoma Bodies [1]                 |                   |                    |          |
|-------------------------------------|-------------------|--------------------|----------|
| Total n = 45                        | Absent n = 21 (%) | Present n = 24 (%) | p value  |
| Sex                                 |                   |                    |          |
| Male                                | 2 (9.5)           | 2 (8.3)            | NS (1.0) |
| Female                              | 19 (90.5)         | 22 (91.7)          |          |
| Age (years)                         |                   |                    |          |
| <45                                 | 7 (33.3)          | 18 (75)            | 0.005    |
| ≥45                                 | 14 (66.7)         | 6 (25)             |          |
| Stroma                              |                   |                    |          |
| Absent                              | 11 (52.4)         | 8 (33.3)           | NS (0.1) |
| Present                             | 10 (47.6)         | 16 (66.7)          |          |
| Tumor size (cm)                     |                   |                    |          |
| <2                                  | 10 (47.6)         | 8 (34.8)           | NS (0.3) |
| ≥2                                  | 11 (52.4)         | 15 (65.2)          |          |
| Capsule                             |                   |                    |          |
| Absent                              | 9 (47.4)          | 14 (63.6)          | NS (0.2) |
| Present                             | 10 (52.6)         | 8 (36.4)           |          |
| Extrathyroid Extension              |                   |                    |          |
| Absent                              | 10 (58.8)         | 13 (56.5)          | NS (0.8) |
| Present                             | 7 (41.2)          | 10 (43.5)          |          |
| Invasion (Vascular and/or capsular) |                   |                    |          |
| Absent                              | 9 (47.4)          | 4 (19)             | NS (0.1) |
| Present                             | 10 (52.6)         | 17 (81)            |          |
| Lymph node metastases               |                   |                    |          |
| Absent                              | 11 (84.6)         | 9 (42.9)           | 0.030    |
| Present                             | 2 (15.4)          | 12 (57.1)          |          |
| RET/PTC translocation               |                   |                    |          |
| Absent                              | 18 (90)           | 17 (77.3)          | NS (0.4) |
| Present                             | 2 (10)            | 5 (22.7)           |          |
| BRAF <sup>V600E</sup> mutation      |                   |                    |          |
| Absent                              | 9 (42.9)          | 12 (52.2)          | NS (0.5) |
| Present                             | 12 (57.1)         | 11 (47.8)          |          |
| RAS mutation                        |                   |                    |          |
| Absent                              | 20 (95.2)         | 22 (95.7)          | NS (1.0) |

|         |         |         |
|---------|---------|---------|
| Present | 1 (4.8) | 1 (4.3) |
|---------|---------|---------|

Abbreviations: NS, not significant. Number in parentheses represent percentages within each category. Bold values indicate the result was statistically significant.

Table S4. Predictive factors for lymph node metastases in papillary thyroid carcinomas.

|                                     | Presence (%) | Lymph Node Metastases (n = 34) |           |                       |          |
|-------------------------------------|--------------|--------------------------------|-----------|-----------------------|----------|
|                                     |              | Univariate Analysis            |           | Multivariate Analysis |          |
|                                     |              | OR (95% CI)                    | P value   | OR (95% CI)           | P value  |
| Total                               | 14 (41)      |                                |           |                       |          |
| Sex                                 |              |                                |           |                       |          |
| Male                                | 1 (7.1)      | 1 (Referent)                   |           |                       |          |
| Female                              | 13 (92.9)    | 1.4 (0.8–25)                   | NS (0.8)  |                       |          |
| Age, years                          |              |                                |           |                       |          |
| < 45                                | 11 (78.6)    | 4.4 (0.9–21)                   | 0.05      | 3.1 (0.5–16)          | NS (0.1) |
| ≥ 45                                | 3 (21.4)     | 1                              |           |                       |          |
| Stroma                              |              |                                |           |                       |          |
| Absent                              | 4 (28.6)     | 1                              |           |                       |          |
| Present                             | 10 (71.4)    | 1.5 (0.3–6.5)                  | NS (0.5)  |                       |          |
| Tumor size (cm)                     |              |                                |           |                       |          |
| < 2                                 | 5 (35.7)     | 1                              |           |                       |          |
| ≥ 2                                 | 9 (64.3)     | 1.3 (0.3–5.4)                  | NS (0.6)  |                       |          |
| PB                                  |              |                                |           |                       |          |
| Absent                              | 2 (14.3)     | 1                              |           |                       |          |
| Present                             | 12 (85.7)    | 7.3 (1.2–41)                   | 0.02      | 5.6 (0.9–34)          | 0.05     |
| Capsule                             |              |                                |           |                       |          |
| Absent                              | 8 (61.5)     | 2.1 (0.5–8.7)                  | NS (0.2)  |                       |          |
| Present                             | 5 (38.5)     | 1                              |           |                       |          |
| Extrathyroid extension              |              |                                |           |                       |          |
| Absent                              | 6 (46.2)     | 1                              |           |                       |          |
| Present                             | 7 (53.8)     | 2.0 (0.4–8.3)                  | NS (0.3)  |                       |          |
| Invasion (Vascular and/or Capsular) |              |                                |           |                       |          |
| Absent                              | 2 (14.3)     | 1                              |           |                       |          |
| Present                             | 12 (85.7)    | 4.3 (0.7–25)                   | NS (0.09) |                       |          |
| BRAF <sup>V600E</sup> mutation      |              |                                |           |                       |          |
| Absent                              | 8 (61.5)     | 1                              |           |                       |          |
| Present                             | 5 (38.5)     | 2.1 (0.5–8.7)                  | NS (0.2)  |                       |          |

OR: odds ratio; CI: confidence interval; NS: non-significant; PB: psammoma bodie.

Table S5. Forward and reverse oligonucleotide sequences.

| Gene            | Oligonucleotide name | Sequence 5' -3'                 |
|-----------------|----------------------|---------------------------------|
| OPNa            | OPNa F               | ATC TCC TAG CCC CAC AGA AT      |
|                 | OPNa R               | CAT CAG ACT GGT GAG AAT CAT C   |
| OPNb            | OPNb F               | CTC CTA GCC CCA CAG ACC CT      |
|                 | OPNb R               | TAT CAC CTC GGC CAT CAT ATG     |
| OPNc            | OPNc F               | CTG AGG AAA AGC AGA ATG         |
|                 | OPNc R               | AAT GGA GTC CTG GCT GT          |
| tOPN            | tOPN F               | CCA ACG AAA GCC ATG ACC AC      |
|                 | tOPN R               | CTG TGG GGA CAA CTG GAG TG      |
| Osteocalcin     | OC F                 | GGC GCT ACC TGT ATC AAT GG      |
|                 | OC R                 | TCA GCC AAC TCG TCA CAG TC      |
| Collagen Type I | Col 1A1 F            | CCC CTG GAA AGA ATG GAG AT      |
|                 | Col 1A1 R            | AAT CCT CGA GCA CCC TGA G       |
| GAPDH           | GAPDH F              | TCC CAT CAC CAT CTT TCA GGA GCA |
|                 | GAPDH R              | TTC TAC ATG GTG GTG AAG ACG CCA |
